# Supplementary material for: Proinflammatory IL-17 pathways dominate the architecture of the immunome in pediatric refractory epilepsy
Source: PubMed Central journal article supplement (PMC6538358; doi:10.1172/jci.insight.126337), 2019-04-18
Supplement: jciinsight-4-126337-s063.pdf [file jciinsight-4-126337-s063.pdf]

# Supplemental Information

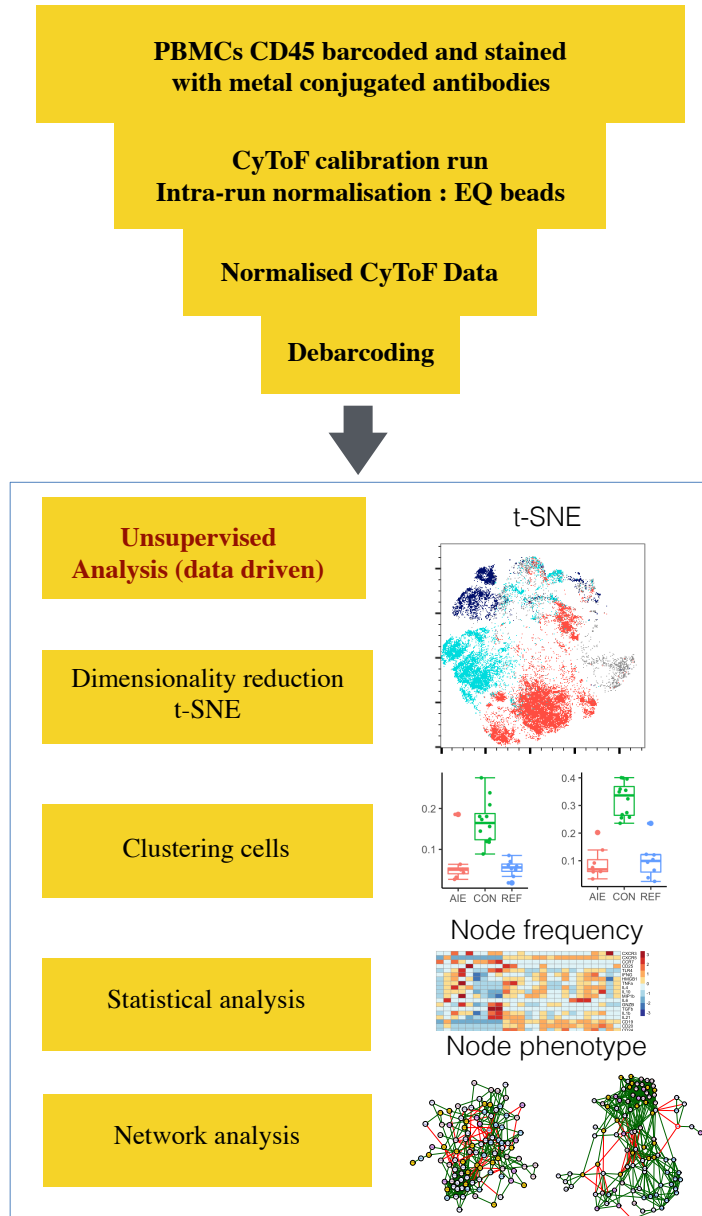

**Supplementary figure1. Mass cytometry data acquisition and analysis workflow.**

Experimental workflow to acquire and analyse the CyTOF data.

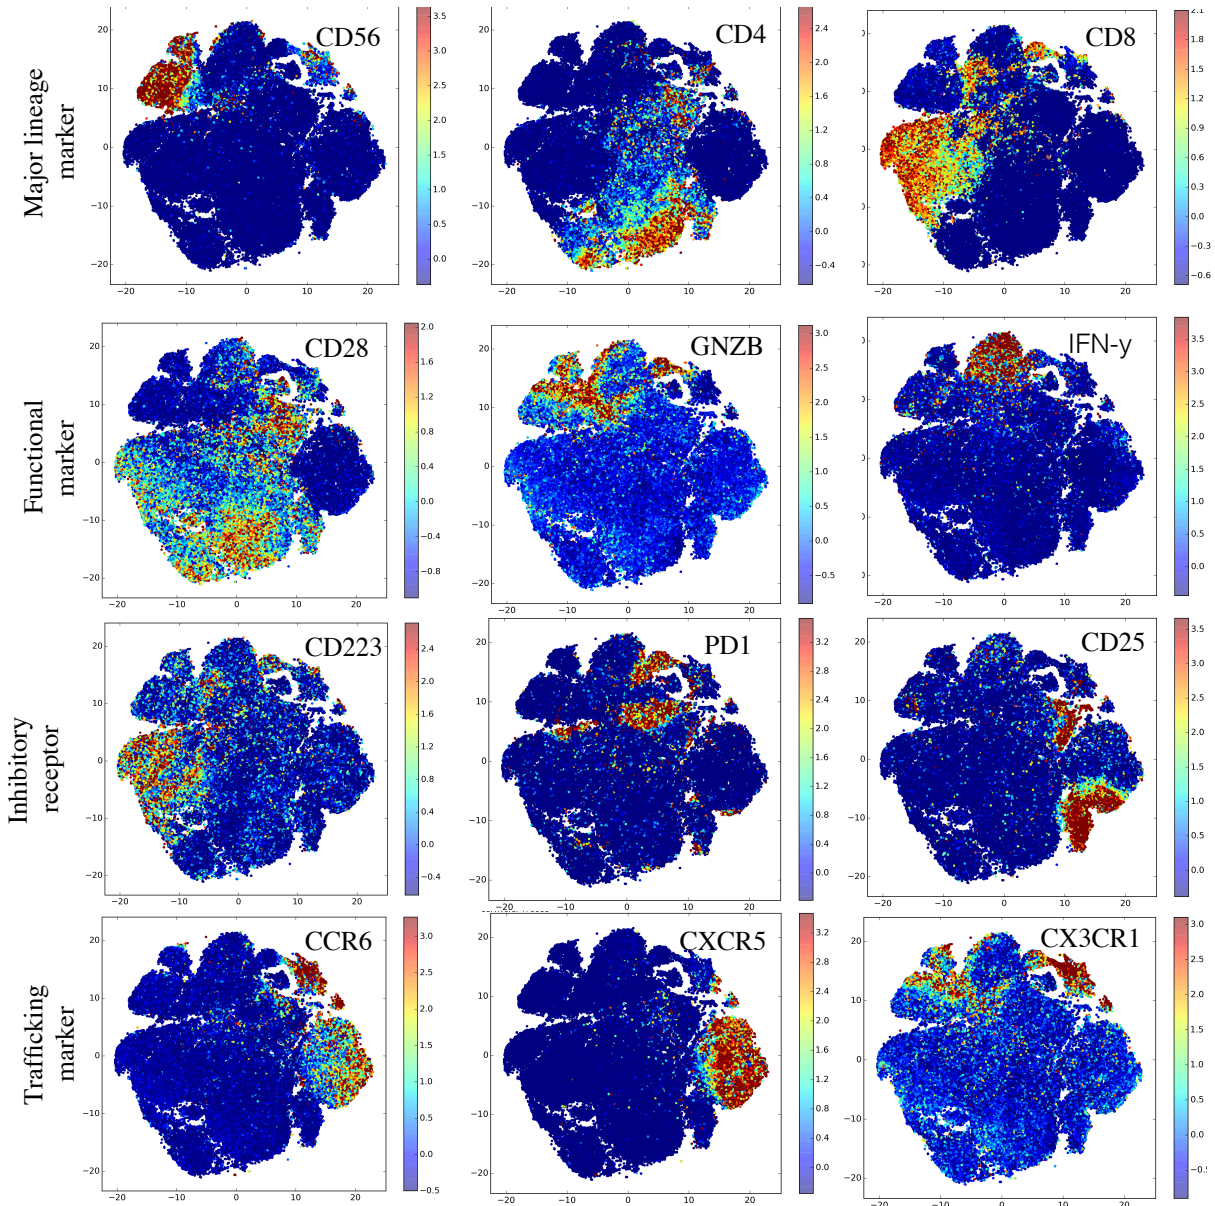

**Supplementary figure 2. Global picture of immune cells visualised on a 2D t-SNE map.**

The t-SNE summarizes the high dimensional CyTOF data on dimensional 2D t-SNE map. The t-SNE map captured and summarized the relationship between 37 markers in an unbiased, data-driven approach. The x and y axes indicate the t-SNE coordinates and the color indicates the expression of the overlaid markers. Plots were visualized in R programming using a custom script.

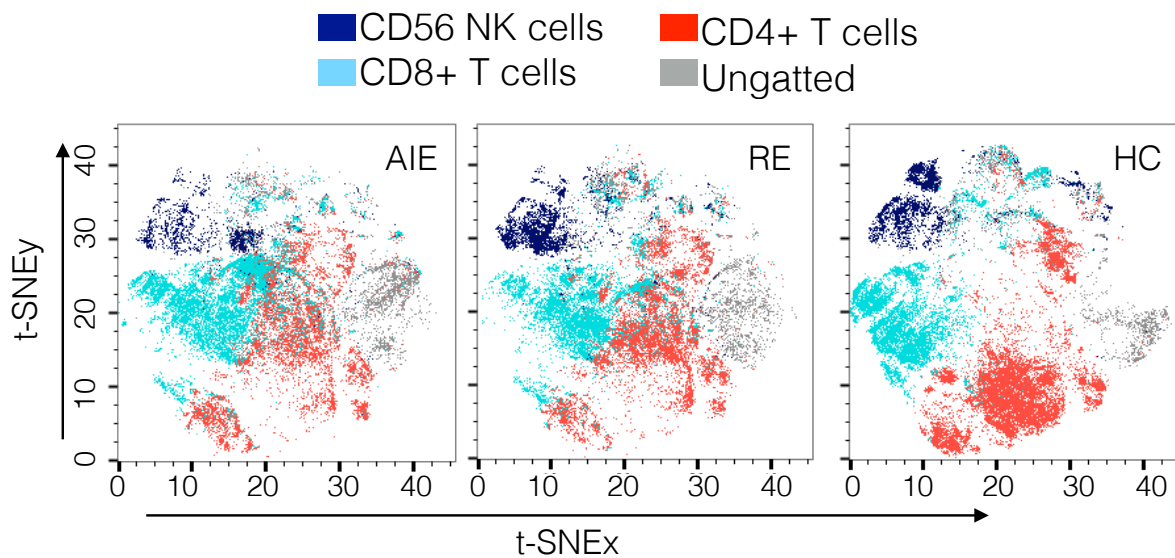

**Supplementary figure 3. Distribution of major cell types visualized on a t-SNE map.**

t-SNE maps with equal number for cells from each group were plotted for AIE, RE and HC.

CD4+ T cells, CD8+ T cells and CD56 NK cells were gated by FlowJO software and the gated cells were overlaid on the t-SNE map. The color indicates the gated cell types. Plots were made using FlowJO software.

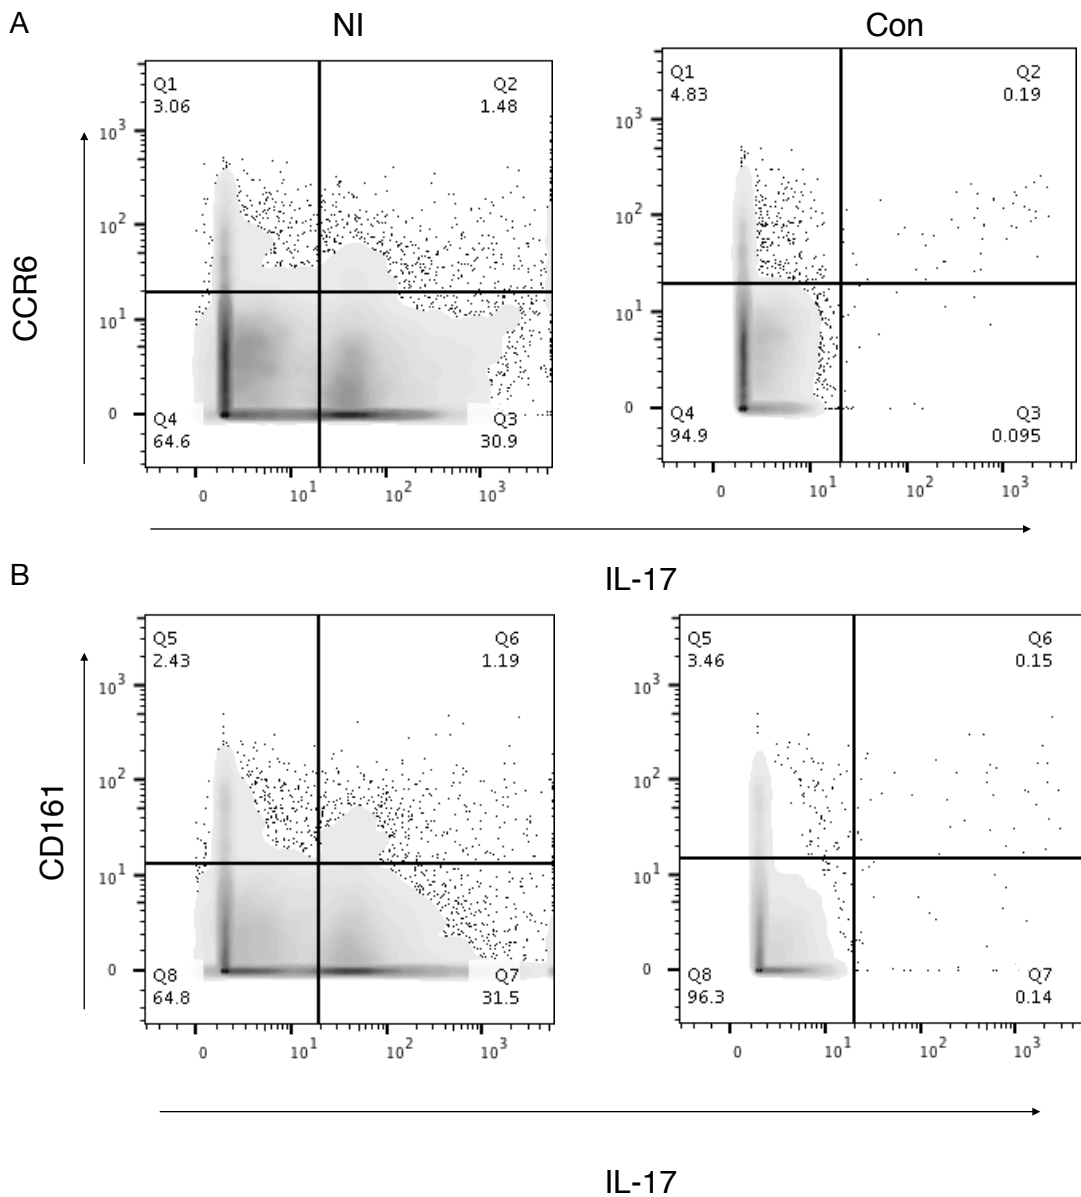

**Supplementary figure 4. Expanded CD4+ IL-17+ T cell population from neuroinflammatory (NI) condition is largely CCR6 and CD161 negative.**

Figure (A) shows CCR6 expression on y-axis while figure (B) shows CD161 expression on y-axis. X-axis shows IL-17 expression. To evaluate the percentage of IL-17+ cells quadrant gate was applied using flow software. Panel shows gated CD4+ T cells from NI (n=16) and Con (n=12)

Supplementary Table 1: Study subject and demographics and clinical characteristic of the patients.

| SampleID | group | Gender | Age   | Race       | Diagnosis | Seizure onset | Seizure Semiology / Frequency | Freq per month Convulsive/ Tonic (MC/ absence/ spasms) | EEG                                                                | MRI                                                                                          | Medication                      | Aetiology, Comments          |
|----------|-------|--------|-------|------------|-----------|---------------|-------------------------------|--------------------------------------------------------|--------------------------------------------------------------------|----------------------------------------------------------------------------------------------|---------------------------------|------------------------------|
| AIE_001  | AIE   | M      | 1.17  | Chinese    | AE        | No seizures   | NA                            | NIL                                                    | Not done                                                           | Bilateral deep grey, cerebral peduncle, cerebellar oedema                                    | IMT                             | autoantibody screen negative |
| AIE_002  | AIE   | M      | 4.5   | Indonesian | AE        | 4y            | BC, Focal motor 3-4x/week     | 10-30                                                  | Generalized slowing                                                | Normal                                                                                       | LVT, IMT                        | NMDAR antibody positive      |
| AIE_003  | AIE   | F      | 8     | Indonesian | AE        | 8y            | Focal motor, BC 1x/month      | < 10                                                   | Bi-temporal slowing                                                | Arachnoid cyst, ventriculomegaly                                                             | VP                              | Negative serology            |
| AIE_004  | AIE   | F      | 10.67 | Malay      | AE        | No seizures   | NA                            | NIL                                                    | Not done                                                           | T2 hyperintensity with restricted diffusion in left frontoparietal lobes                     | IMT                             | VGKC antibody positive       |
| AIE_006  | AIE   | M      | 11.17 | Chinese    | AE        | 11y           | TS 3x/week                    | 10-30                                                  | Generalized slow waves                                             | Bilateral symmetrical enlargement and T2 hyperintensity of BG with areas of thickened cortex | LVT, CLZ, IMT                   | autoantibody screen negative |
| AIE_008  | AIE   | M      | 12.75 | Indian     | AE        | 13y           | BC, HC 12x/month              | 10-30                                                  | Slowing over temporal regions, then R frontal/posterior discharges | Normal                                                                                       | PHB, LVT, TPM                   | autoantibody screen negative |
| AIE_009  | AIE   | M      | 1.17  | Malay      | AE        | 16m           | SE, TS (6x/day)               | 90-180                                                 | Generalized spike-wave discharges                                  | Cerebral atrophy                                                                             | LVT, PMP VP, TPM, PHB, CLZ, IMT | FIRES                        |

|         |     |   |       |         |                                    |             |                                                      |                       |                                           |                                                             |                                       |                                                                                          |
|---------|-----|---|-------|---------|------------------------------------|-------------|------------------------------------------------------|-----------------------|-------------------------------------------|-------------------------------------------------------------|---------------------------------------|------------------------------------------------------------------------------------------|
| AIE_010 | AIE | F | 15.75 | Burmese | AE                                 | No seizures | NA                                                   | NIL                   | Not done                                  | Normal                                                      | IMT                                   | autoantibody screen negative                                                             |
| REF_001 | REF | M | 1.33  | Burmese | Focal epilepsy                     | 3m          | Tonic, Bilat. convulsive 20x/day                     | >180                  | R parieto-occipital epileptic discharges  | Heterotopia adjacent to right occipital horn                | LVT, CBZ, CLZ, ZNS, VGB, PHB          | Focal cortical dysplasia Epilepsy surgery right parieto-occipital region at 16m          |
| REF_002 | REF | F | 8.5   | Chinese | Focal epilepsy                     | 6y          | Focal motor, Epileptic spasms 10-15x/m               | 10-30 (several daily) | Normal interictal                         | Encephalomalacia in the BG, cerebral and cerebellar atrophy | LVT                                   | Leigh's syndrome Progressive neurodegeneration with dystonia, polymyoclonus and seizures |
| REF_003 | REF | M | 19.33 | Chinese | Progressive Myoclonic Epilepsy     | 10y         | Bilateral convulsive, Myoclonic, 1x/every 2 to 3m    | <10 (several daily)   | Polyspikes in central region              | Normal                                                      | PCT, ZNS, LVT, VP                     | KCNK1 mutation identified                                                                |
| REF_004 | REF | F | 20.83 | Malay   | Epilepsy with generalized seizures | 11y         | Bilateral convulsive, tonic, absence Up to 3 x/ week | 10-30 (several daily) | Anterior dominant generalized spike waves | Normal                                                      | LMT, LVT, ACZ, PHT, VP, ETX, CBZ      |                                                                                          |
| REF_005 | REF | F | 8.5   | Indian  | Focal epilepsy                     | 7m          | Tonic, drop attacks                                  | 60-90                 | Multifocal discharges                     | Multiple subcortical tubers and subependymal nodules        | CBZ, LTG, LVT, VP, CBZ, TPM, VGB, PMP | Tuberous sclerosis FDG PET scan and EEG non-localising                                   |

|         |     |   |       |         |                                |     |                                              |                       |                                   |        |                                                              |                                  |
|---------|-----|---|-------|---------|--------------------------------|-----|----------------------------------------------|-----------------------|-----------------------------------|--------|--------------------------------------------------------------|----------------------------------|
| REF_006 | REF | F | 20.17 | Indian  | Progressive Myoclonic Epilepsy | 3y  | Bilateral convulsive Myoclonic 2-3 x per day | 60-90 (several daily) | Generalized spike-wave discharges | Normal | PCT, VP, ZNS, NTZ, LMT, CLZ, LVT, ACZ, CLNZ, pyridoxine, IMT |                                  |
| REF_007 | REF | M | 2     | Chinese | Focal epilepsy                 | 5m  | Tonic, Bilat. convulsive, Myoclonic 3x/day   | 60-90                 | Normal interictal EEG             | Normal | CBZ, LVT, PMP                                                |                                  |
| REF_010 | REF | F | 12.67 | Chinese | Progressive Myoclonic Epilepsy | 10y | Bilateral convulsive, Myoclonic, Daily       | 30-60 (several daily) | Central ED                        | Normal | PCT, VP, PMP, LVT, ZNS                                       | <i>KCNCl</i> mutation identified |
| CON_001 | con | M | 11    | Malay   | Healthy controls               |     |                                              |                       |                                   |        |                                                              |                                  |
| CON_002 | con | M | 9     | Malay   | Healthy controls               |     |                                              |                       |                                   |        |                                                              |                                  |
| CON_003 | con | M | 6     | Indian  | Healthy controls               |     |                                              |                       |                                   |        |                                                              |                                  |
| CON_004 | con | M | 6     | Malay   | Healthy controls               |     |                                              |                       |                                   |        |                                                              |                                  |
| CON_005 | con | M | 6     | Chinese | Healthy controls               |     |                                              |                       |                                   |        |                                                              |                                  |
| CON_006 | con | M | 8     | Chinese | Healthy controls               |     |                                              |                       |                                   |        |                                                              |                                  |
| CON_007 | con | M | 11    | Indian  | Healthy controls               |     |                                              |                       |                                   |        |                                                              |                                  |

|         |     |   |    |         |                  |  |  |  |  |  |  |  |  |  |  |  |  |
|---------|-----|---|----|---------|------------------|--|--|--|--|--|--|--|--|--|--|--|--|
| CON_008 | con | F | 13 | Chinese | Healthy controls |  |  |  |  |  |  |  |  |  |  |  |  |
| CON_009 | con | F | 6  | Chinese | Healthy controls |  |  |  |  |  |  |  |  |  |  |  |  |
| CON_010 | con | F | 12 | Malay   | Healthy controls |  |  |  |  |  |  |  |  |  |  |  |  |
| CON_011 | con | M | 9  | Malay   | Healthy controls |  |  |  |  |  |  |  |  |  |  |  |  |
| CON_012 | con | M | 13 | Chinese | Healthy controls |  |  |  |  |  |  |  |  |  |  |  |  |

Medications : ACZ: Acetazolamide; CBZ: Carbamazepine, CLNZ: Clonazepam; CLZ: Clobazam, ETX: Ethosuximide; LVT: Levetiracetam; LMT: Lamotrigine; NTZ: Nitrazepam; OCBZ: Oxcarbazepine; PCT: Piracetam; PHB: Phenobarbitone; PMP: Perampanel; TPM: Topiramate; VGB: Vigabatrin, VP: Valproate; ZNS: Zonisamide



**Supplementary Table 2. Panel 1 Antibodies conjugated metal, clone and vendor information**

| <b>Metal</b> | <b>Antibody</b>   | <b>Clone</b> | <b>Vendor</b>    |
|--------------|-------------------|--------------|------------------|
| 89           | CD45A             | HI30         | Fluidigm         |
| 112/114      | CD14              | TüK4         | Lifetechnologies |
| 115          | CD45B             | HI30         | Biolegend        |
| 139          | CD3               | 145-2C11     | Biolegend        |
| 141          | CD28              | 37.51        | Biolegend        |
| 142          | CD45RO            | UCHL1        | Biolegend        |
| 143          | IL-6              | MQ2-13A5     | Biolegend        |
| 144          | CD8               | SK1          | Biolegend        |
| 145          | TGF-b             | TW4-6H10     | Biolegend        |
| 146          | TCR-gd            | B1           | Biolegend        |
| 147          | PD-1              | EHI12.2H7    | Biolegend        |
| 148          | CD4               | SK3          | Biolegend        |
| 149          | biotin (IL-1beta) | HIb-98       | Biolegend        |
| 150          | PE-(IL-22)        | 2G12A41      | Biolegend        |
| 151          | TNF-a             | MAb11        | Biolegend        |
| 152          | NKp46             | 9E+02        | Biolegend        |
| 153          | CD25              | 3C7          | Biolegend        |
| 154          | CD27              | O323         | Biolegend        |
| 155          | CCR7              | G043H7       | Biolegend        |
| 156          | IL-4              | 11B11        | Biolegend        |
| 157          | CCR4              | L291H4       | Biolegend        |
| 158          | IL-10             | JES3-9D7     | Biolegend        |
| 159          | CD45C             | HI30         | Biolegend        |

|         |                     |          |               |
|---------|---------------------|----------|---------------|
| 160     | CD223               | 11C3C65  | Biolegend     |
| 161     | CD56                | NCAM16.2 | BD bioscience |
| 162     | CD62L               | DREG56   | Biolegend     |
| 163     | CXCR3               | G025H7   | Biolegend     |
| 164     | CD161               | HP-3G10  | Biolegend     |
| 165     | FoxP3               | PCH101   | Ebioscience   |
| 166     | CXCR5               | J252D4   | Biolegend     |
| 168     | IFN- $\gamma$       | B27      | Biolegend     |
| 169     | IL-17A              | BL168    | Biolegend     |
| 170     | CCR6                | G034E3   | Biolegend     |
| 171     | CD45RA              | JS-83    | Ebioscience   |
| 172     | IL-21               | 3A3-N2   | Biolegend     |
| 173     | GranzymeB           | 16G6     | Biolegend     |
| 174     | CX3CR1              | K0124E1  | Biolegend     |
| 175     | CD154               | 24-31    | Biolegend     |
| 176     | CD69                | FN50     | Biolegend     |
| 209     | CD16                | 3G8      | Fluidigm      |
| 191/193 | DNA Ir Intercalator |          | Fluidigm      |

**Supplementary Table 3. Panel 2 Antibodies conjugated metal, clone and vendor information**

| <b>Metal</b> | <b>Antibody</b>        | <b>Clone</b> | <b>Vendor</b>    |
|--------------|------------------------|--------------|------------------|
| 89           | CD45A                  | HI30         | Fluidigm         |
| 112/114      | CD14                   | TüK4         | Lifetechnologies |
| 115          | CD45B                  | HI30         | Biolegend        |
| 139          | CD3                    | 145-2C11     | Biolegend        |
| 141          | CD19                   | HIB19        | Biolegend        |
| 142          | CD45RO                 | UCHL1        | Biolegend        |
| 143          | IL-6                   | MQ2-13A5     | Biolegend        |
| 144          | CD8                    | SK1          | Biolegend        |
| 145          | TGF- $\beta$           | TW4-6H10     | Biolegend        |
| 146          | IgD                    | 11.26c.2a    | Biolegend        |
| 147          | CD20                   | 2H7          | Biolegend        |
| 148          | CD4                    | SK3          | Biolegend        |
| 149          | biotin (IL-1 $\beta$ ) | Hib-98       | Biolegend        |
| 150          | HLADR                  | L-243        | Biolegend        |
| 151          | TNF- $\alpha$          | MAb11        | Biolegend        |
| 152          | CD24                   | MI/69        | Biolegend        |
| 153          | CD25                   | 3C7          | Biolegend        |
| 154          | CD27                   | O323         | Biolegend        |
| 155          | CCR7                   | G043H7       | Biolegend        |
| 156          | IL-4                   | 11B11        | Biolegend        |
| 157          | CD11c                  | 3.9          | Biolegend        |
| 158          | IL-10                  | JES3-9D7     | Biolegend        |
| 159          | CD45C                  | HI30         | Biolegend        |

|         |                     |          |               |
|---------|---------------------|----------|---------------|
| 160     | IgM                 | MHM88    | Biolegend     |
| 161     | CD11b               | ICRF44   | BD bioscience |
| 162     | IL-8                | BH0514   | Biolegend     |
| 163     | CXCR3               | G025H7   | Biolegend     |
| 164     | CD161               | HP-3G10  | Biolegend     |
| 165     | CD103               | Ber-ACT8 | Biolegend     |
| 166     | CXCR5               | J252D4   | Biolegend     |
| 167     | CD38                | clone 90 | Biolegend     |
| 168     | IFN- $\gamma$       | B27      | Biolegend     |
| 170     | HMGB1               | 3E+08    | Biolegend     |
| 171     | CD45RA              | JS-83    | Ebioscience   |
| 172     | IL-21               | 3A3-N2   | Biolegend     |
| 173     | GranzymeB           | 16G6     | Biolegend     |
| 174     | TLR4                | HTA125   | Biolegend     |
| 175     | MIP-1beta           | 24006    | R&D Systems   |
| 176     | CD69                | FN50     | Biolegend     |
| 209     | CD16                | 3G8      | Fluidigm      |
| 191/193 | DNA Ir Intercalator |          | Fluidigm      |

**Supplementary Table 4: Properties of NI and HC network**

| <b>Network property</b>     | <b>NI Network</b> | <b>HC network</b> |
|-----------------------------|-------------------|-------------------|
| Modularity score            | 0.146             | 0.087             |
| Network centralization      | 0.194             | 0.138             |
| Network density             | 0.101             | 0.076             |
| Network heterogeneity       | 0.584             | 0.690             |
| Avg no of neighbours        | 10.323            | 7.924             |
| Negatively correlated edges | 34                | 60                |
| Positively correlated edges | 508               | 355               |

**Supplementary Table 5. Node phenotype**

| <b>Node</b> | <b>Marker Expression</b> | <b>Phenotype</b>           |
|-------------|--------------------------|----------------------------|
| 6           | CD4+CCR7+CD45RA+         | Naive/effector CD4 T cells |
| 7           | CD4+CCR7+CD45RA+         | Naive/effector CD4 T cells |
| 2           | CD4+CCR7+CD45RA+         | Naive/effector CD4 T cells |
| 23          | CD4+CCR7+CD45RA+         | Naive/effector CD4 T cells |
| 24          | CD4+CCR7+CD45RA-         | Memory CD4 T cells         |
| 25          | CD4+CCR7+CD45RA+         | Naive/effector CD4 T cells |
| 49          | CD4+ PD1+                | Inhibitory CD4 T cells     |
| 51          | CD4+ CD45RA              | Memory CD4 T cells         |
| 52          | CD4+CCR7+CD45RA+         | Naive/effector CD4 T cells |
| 55          | CD4+CCR7+CD45RA+         | Naive/effector CD4 T cells |
| 61          | CD4+CCR7+CD45RA+         | Naive/effector CD4 T cells |
| 62          | CD4+CCR7+CD45RA+         | Naive/effector CD4 T cells |

|     |                       |                            |
|-----|-----------------------|----------------------------|
| 64  | CD4+CCR7+CD45RA-      | Memory CD4 T cells         |
| 65  | CD4+ IL-17+           | Th17                       |
| 88  | CD4+ IL-17+IL22+      | Th17                       |
| 89  | CD4+ IL-17+IFNg+      | Th17                       |
| 92  | CD4+ IL-17+IL22+IFNg+ | Th17                       |
| 94  | CD4+ IL-17+           | Th17                       |
| 95  | CD4+ IL-17+IFNg+      | Th17                       |
| 72  | CD4+ IL-17+           | Th17                       |
| 36  | CD4+ IL-17+           | Th17                       |
|     |                       |                            |
| 16  | CD8+LAG3+CCR7-        |                            |
| 28  | CD8+LAG3+PD1+         | Memory CD8 T cells         |
| 101 | CD8+LAG3+CCR7+CD45RA+ | Naive/effector CD4 T cells |
| 67  | CD8+LAG3+CCR7+CD45RA+ | Naive/effector CD4 T cells |
| 68  | CD8+LAG3+CCR7+CD45RA+ | Naive/effector CD4 T cells |
| 79  | CD8+LAG3+CCR7+CD45RA+ | Naive/effector CD4 T cells |
| 80  | CD8+LAG3+CCR7+CD45RA+ | Naive/effector CD4 T cells |
| 85  | CD8+LAG3+CCR7-CD45RA- | Memory CD8 T cells         |
| 100 | CD8+LAG3+CCR7+CD45RA+ | Naive/effector CD4 T cells |
| 83  | CD8+LAG3+CCR7+CD45RA+ | Naive/effector CD4 T cells |
| 2   | CD8+LAG3+CCR7+CD45RA+ | Naive/effector CD4 T cells |
| 87  | CD8+LAG3+CCR7+CD45RA+ | Naive/effector CD4 T cells |
|     |                       |                            |
| 48  | CD19+CD27-CD25+       | Naive B cells              |
| 23  | CD19+CD27-CD25-       | Naive B cells              |
| 68  | CD19+CD27-CD25-       | Naive B cells              |
| 64  | CD19+CD27+CD25-       | Memory B cells             |
|     |                       |                            |

|    |                             |                           |
|----|-----------------------------|---------------------------|
| 44 | CD56+CX3CR1+GNZB+IFNg+      | Pro-inflammatory NK cells |
| 30 | CD56+CX3CR1+GNZB+IL21+      | Pro-inflammatory NK cells |
| 34 | CD56+CX3CR1+GNZB+TNFa+IFNg+ | Pro-inflammatory NK cells |
| 35 | CD56+CX3CR1+GNZB+TNFa+IFNg+ | Pro-inflammatory NK cells |
